# Supplementary material
Source: MDPI journal article supplement (https://www.mdpi.com/2227-7102/11/4/155)
Supplement: s1 [file s1]

**Supplementary Materials.** Description of Arithmetic Word Problems (AWP): problem statement, Arithmetic operations for solving, number of operations, Inconsistences and possible superficial responses.

| # | Problem                                                                                                                                                                                                                                                                                                                                           | Arithmetic                    | # Ops | Inconsistences | Superficial Responses                                                                                          |
|---|---------------------------------------------------------------------------------------------------------------------------------------------------------------------------------------------------------------------------------------------------------------------------------------------------------------------------------------------------|-------------------------------|-------|----------------|----------------------------------------------------------------------------------------------------------------|
| 1 | In Mercadona, a bottle of Rioja wine costs 20 Euros. In Ahorramás, the same bottle of wine costs 2 Euros less than in Mercadona. If you need to buy 4 bottles of this Rioja wine, how much will you have to pay in Ahorramás?                                                                                                                     | $(20 - 2) \times 4 = 72$      | 2     | No             | --                                                                                                             |
| 2 | In SportGood, NK brand sneakers cost 50 Euros. This is 3 Euros more than what you have to pay for the same shoes at Primark. If you need to buy 4 pairs of NK sneakers, how much will you have to pay at Primark?                                                                                                                                 | $(50 - 3) \times 4 = 188$     | 2     | Yes            | $(50 + 3) \times 4 = 212$                                                                                      |
| 3 | In Media-Markt, a Samsung digital tablet costs 70 Euros and a mini SG tablet costs 6 Euros less. In Mundo-Electrónico, the same digital tablet costs 4 Euros less than in Media-Markt. If in an educational institute they need to buy 5 mini SG tablets, how much will they have to pay at Mundo-Electrónico?                                    | $(70 - 6 - 4) \times 5 = 300$ | 3     | No – No        | --                                                                                                             |
| 4 | In Fnac, a box of coloured pencils costs 18 Euros. This is 2 Euros more than what you have to pay for a box of coloured pencils at the Folder bookstore. A box of crayons costs 4 Euros less than a box of coloured pencils in the Folder bookshop. If you need to buy 3 boxes of crayons, how much will you have to pay at the Folder bookstore? | $(18 - 2 - 4) \times 3 = 36$  | 3     | Yes – No       | $(18 + 2 - 4) \times 3 = 48$                                                                                   |
| 5 | In Toys-r-Us, a plastic skateboard costs 30 Euros. This is 5 Euros more than what you have to pay for a plastic skateboard at Decathlon. In Decathlon, a plastic skateboard costs 7 Euros less than a carbon fibre skateboard. If you need to buy 2 carbon fibre skateboards, how much will you have to pay in Decathlon?                         | $(30 - 5 + 7) \times 2 = 64$  | 3     | Yes – Yes      | Sup1: $(30 + 5 + 7) \times 2 = 84$<br>Sup2: $(30 - 5 - 7) \times 2 = 54$<br>Sup3: $(30 + 5 - 7) \times 2 = 56$ |
